# Supplementary material
Source: PubMed Central journal article supplement (PMC2075314)
Supplement: jphysiol_2007.132373_1.pdf [file jphysiol_2007.132373_1.pdf]

| <b>Accession#</b> | <b>Name</b>                                             | <b>Primer Sequence 5' - 3'</b>                                        | <b>Product-bp</b> |
|-------------------|---------------------------------------------------------|-----------------------------------------------------------------------|-------------------|
| AB028272          | DnaJ (Hsp40) homolog, subfamily B, member 1             | sense: AAGCGCGAGATTTTCGACC<br>antisense: GCTACCACCCTTCAGGCCTT         | 53                |
| AF041847          | cardiac responsive adriamycin protein                   | sense: ATAAACGGACGGCACTCCAC<br>antisense: CGATCGCCAAGTGCCTTCTA        | 53                |
| AF051945          | cardiac morphogenesis                                   | sense: GAATTCCAGACTGGGTCAACTACC<br>antisense: CTGTATTCCCAAATTGGRCCATC | 96                |
| AF055638          | growth arrest and DNA-damage-inducible 45 gamma         | sense: AAGATGAGGGCGACATAGCG<br>antisense: ACGCCTGAATCAACGTGAAAT       | 53                |
| AF084466          | Ras-related associated with diabetes                    | sense: CATCATTCTCGTGGGCAACA<br>antisense: GAGACCTCACGAGAGCGCAC        | 53                |
| AI648850          | myosin, light polypeptide 4, alkali; atrial, embryonic  | sense: GACCTGAGAGCTGTAAGCCGA<br>antisense: GAAAGGTAACCTAGGAAGGGCAG    | 53                |
| AI835883          | actin related protein 2/3 complex, subunit 2            | sense: ACCTGGAAAATCTACCTGCATCC<br>antisense: TGCCAGCATGATGCACAAT      | 53                |
| AJ242874          | troponin I, skeletal, slow 1                            | sense: CAGCCTATGCGCACACCTTT<br>antisense: TCCCCTTTGTGTCCATTTT         | 53                |
| AV213431          | troponin T1, skeletal, slow                             | sense: ATCAATGTCCTTTACAACCGCA<br>antisense: CCCCTTTTCGGAATTTCTGG      | 53                |
| D14077            | clusterin                                               | sense: GATGAAGGGCCAGTGTA AAA<br>antisense: GAACAGTCCACAGACAAGATCTCCT  | 53                |
| J04181            | actin, beta, cytoplasmic                                | sense: CTATTGGCAACGAGCGGTTC<br>antisense: AGGAAGGCTGGAAAAGAGCCT       | 53                |
| J04633            | heat shock protein 1, alpha                             | sense: TGCCTATTTGGTTGCTGAGAAA<br>antisense: TCGTCGTTATGCTTCGTGATG     | 53                |
| K02236            | metallothionein 2                                       | sense: TAGTCCTTGAGATAGTGGCTCGC<br>antisense: CCTAGGAACCTGAGGCAAATCA   | 56                |
| M12289            | myosin, heavy polypeptide 8, skeletal muscle, perinatal | sense: AGACCGCAAGAATGTGCTCC<br>antisense: CGCCTGTAATTTGTCCACCAG       | 54                |

|        |                                                               |                                                                        |    |
|--------|---------------------------------------------------------------|------------------------------------------------------------------------|----|
| M12571 | heat shock protein 1A                                         | sense: CCAAGAACGCGCTCGAAT<br>antisense: CTGAGCTTGCCCTTGAGACC           | 78 |
| M13441 | tubulin, alpha 6                                              | sense: ATCTGTCGTAGAAACCTCGACATTG<br>antisense: GGTTAAGGTTGGTGTAGGTTGGG | 54 |
| M18779 | myogenic differentiation 1 (MyoD)                             | sense: CGGCTACCCAAGGTGGAGAT<br>antisense: ACCTTCGATGTAGCGGATGG         | 53 |
| M19436 | myosin, light polypeptide 4, alkali; atrial, embryonic        | sense: CAACACATCTCCCGCAACAA<br>antisense: CCCCTCCACGAAGTCCTCAT         | 56 |
| M28727 | tubulin, alpha 2                                              | sense: CTGATGTATGCCAAGCGTGC<br>antisense: CATGCCCTCACCCACATACC         | 53 |
| M28845 | early growth response 1                                       | sense: GACCTCTTCATCCTCGGCG<br>antisense: GCAGAGGAAGACGATGAAGCA         | 53 |
| M59821 | immediate early response 2                                    | sense: TCAAGGCCGTTTCACTACCATT<br>antisense: GCGTGCCCACTTGTAGGG         | 53 |
| M74753 | myosin, heavy polypeptide 3, skeletal muscle, embryonic       | sense: TTGAAACCGTGAAACGGGAG<br>antisense: CCGTTCTCGGCAATCTGTTC         | 78 |
| M74753 | myosin, heavy polypeptide 3, skeletal muscle, embryonic       | sense: TTGAAACCGTGAAACGGGAG<br>antisense: CCGTTCTCGGCAATCTGTTC         | 78 |
| U19118 | activating transcription factor 3                             | sense: CTTTGTCTCACCAATTCCAGGAT<br>antisense: TGAGACTGGCCGGGATGATA      | 53 |
| U25844 | serine (or cysteine) proteinase inhibitor, clade B, member 6a | sense: GAATTACAACATGAACGATGCCC<br>antisense: AAGGCATCAGTCATGCCCA       | 53 |
| U68267 | myosin binding protein H                                      | sense: AAGATCCGTGTTCCCCGAC<br>antisense: TCCCACCTGGCGGATGTA            | 53 |
| V00727 | FBJ osteosarcoma oncogene                                     | sense: GACGCACAGACCACACAACAG<br>antisense: TCAGGAAGTGCAGTCAGTAGCG      | 53 |
| V00835 | metallothionein 1                                             | sense: TAGAGGCTTGGCGGGAATAG<br>antisense: GCTTTTGCAAGAGCGGATTCT        | 78 |
| X15784 | myogenin                                                      | sense: CTGACCCTACAGACGCCAC<br>antisense: TGTCCACGATGGACGTAAGG          | 53 |

|        |                                               |                                       |    |
|--------|-----------------------------------------------|---------------------------------------|----|
| X59060 | myogenic factor 6                             | sense: GAGATTCTGCGGAGTGCCAT           | 53 |
|        |                                               | antisense: CAGCAGGTCCTGTAGACGCTC      |    |
| X61800 | CCAAT/enhancer binding protein (C/EBP), delta | sense: GAATCGCTAGTTTCTTTGGGACC        | 80 |
|        |                                               | antisense: TAATATAGCTTCTCTCGCAGTCCAGT |    |
| X71922 | insulin-like growth factor 2                  | sense: TTCCTGAGCAGTTTGCATGG           | 53 |
|        |                                               | antisense: GAAACTAGATGGATTGGGAGGAGAG  |    |
